# Supplementary material
Source: HighWire-hosted journal article supplement (https://bmjopen.bmj.com/content/12/5/e055961)
Supplement: inline-supplementary-material-1 [file inline-supplementary-material-1.pdf]

Table S1. Association between marital status and subsequent birth between fistula development and repair

|                                                            | Separated | Married | Total |
|------------------------------------------------------------|-----------|---------|-------|
| No subsequent birth between fistula development and repair | 2,262     | 2,698   | 4,960 |
|                                                            | 89.5%     | 86.9%   | 88.1% |
| Subsequent birth between fistula development and repair    | 266       | 407     | 673   |
|                                                            | 10.5%     | 13.1%   | 11.9% |
| Total                                                      | 2,528     | 3,105   | 5,633 |
